# Supplementary material for: Real-Time Monitoring of H2O2 Sterilization on Individual Bacillus atrophaeus Spores by Optical Sensing with Trapping Raman Spectroscopy
Source: MDPI journal article supplement (doi:10.3390/chemosensors11080445), 2023-08-10
Supplement: s1 [file s1]

Archive with 1 entries (1 files):
- chemosensors-2526916-supplementary.pdf
